# Supplementary material for: Atomic layer deposition of CdxZn1−xS films
Source: Royal Society of Chemistry journal article supplement (doi:10.1039/c0jm02786c), 2010-11-02
Supplement: c0jm02786c.pdf [file c0jm02786c.pdf]

## Supporting Information Atomic Layer Deposition of $\text{Cd}_x\text{Zn}_{1-x}\text{S}$ Films

Jonathan. R. Bakke <sup>a</sup>, Jukka T. Tanskanen <sup>a,c</sup>, Hee Joon Jung <sup>b</sup>, Robert Sinclair <sup>b</sup>, Stacey F. Bent <sup>a</sup>

<sup>a</sup> Department of Chemical Engineering, Stanford University, Stanford, California 94305, USA

<sup>b</sup> Department of Materials Science and Engineering, Stanford University, Stanford, California 94305, USA

<sup>c</sup> Department of Chemistry, University of Eastern Finland, Yliopistokatu 7, 80130 Joensuu, Finland

Email: [sbent@stanford.edu](mailto:sbent@stanford.edu)

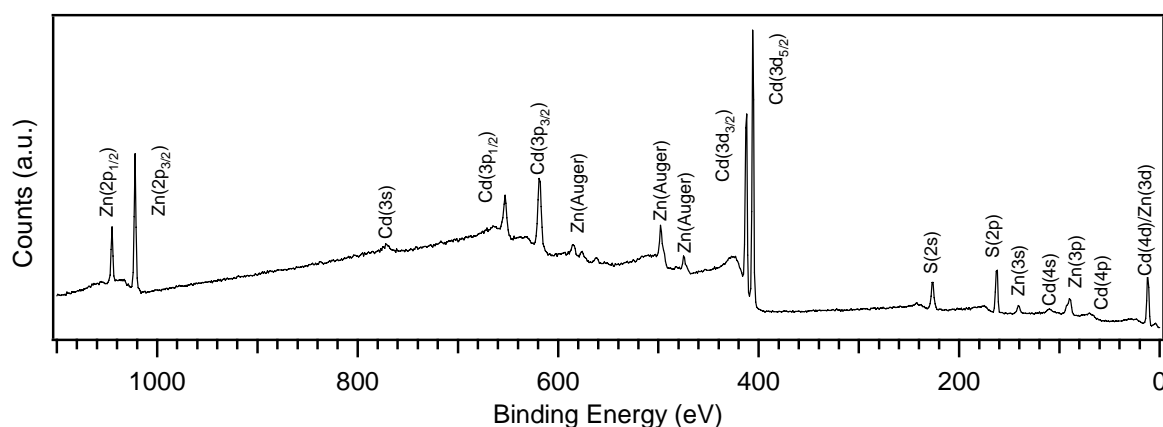

**Figure S1:** XPS spectrum of a 500 cycle 40% 2x3 alloy deposited at 150 °C on Si(100) shows the presence of only Cd, Zn, and S

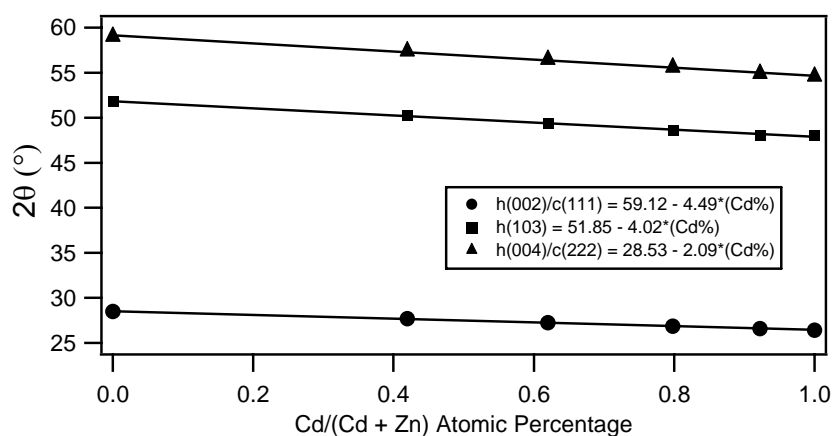

**Figure S2:** Location of peaks in XRD patterns from Figure 4 as a function of alloy composition as determined by XPS for films deposited at 150 °C on Si(100). The peaks for a given phase are linearly correlated to the composition.

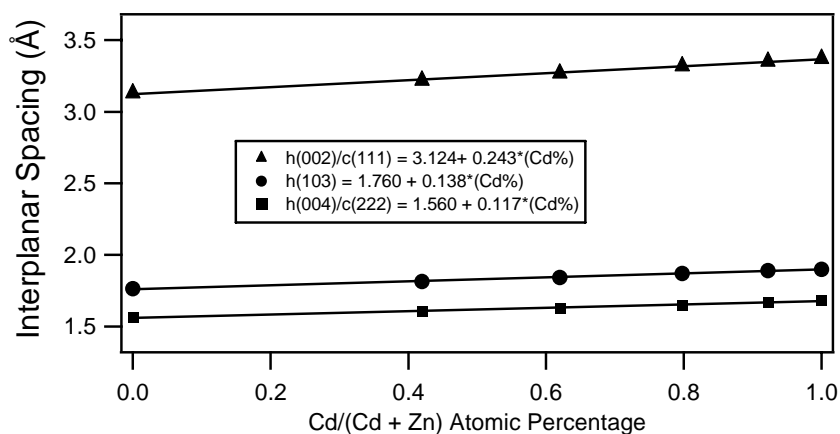

**Figure S3: Interplanar spacing as calculated using the XRD patterns in Figure 4 and angles in Figure S2 as a function of alloy composition using Bragg's Law for films deposited at 150 °C. Alloy compositions were determined by XPS**

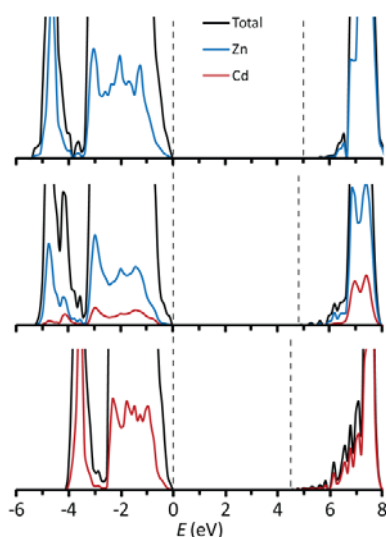

**Figure S4: PBE0-calculated electronic density of states of pure ZnS (top), of an alloy with a CdS/(CdS+ZnS) ratio of 0.22 (middle), and of pure CdS (bottom). Top of the valence band is given as zero energy and illustrated, and the dashed lines represent the maximum of valence band and the minimum of conduction band.**
